# Supplementary material for: The parasitic worm product ES-62 promotes health- and life-span in a high calorie diet-accelerated mouse model of ageing
Source: PubMed Central journal article supplement (PMC7108737; doi:10.1371/journal.ppat.1008391), 2020-03-12
Supplement: ppat.1008391.s001.pdf [file ppat.1008391.s001.pdf]

**S1 Table: Descriptive Statistics of the longevity cohort**

| <b>Cox Regression Analysis<sup>a</sup></b> |          |           |             |           |            |               |
|--------------------------------------------|----------|-----------|-------------|-----------|------------|---------------|
| <b>Covariate</b>                           | <b>B</b> | <b>SE</b> | <b>Wald</b> | <b>Df</b> | <b>Sig</b> | <b>Exp(B)</b> |
| Treatment                                  | -0.130   | 0.206     | 0.399       | 1         | 0.528      | 0.878         |
| Sex                                        | 0.541    | 0.222     | 5.933       | 1         | 0.015      | 1.717         |

  

| <b>Descriptive Statistics<sup>b</sup></b> |                  |               |             |                |                   |          |
|-------------------------------------------|------------------|---------------|-------------|----------------|-------------------|----------|
| <b>Sex</b>                                | <b>Treatment</b> | <b>Median</b> | <b>Mean</b> | <b>Min-Max</b> | <b>Oldest 10%</b> | <b>n</b> |
| Male                                      | PBS              | 629           | 636 ± 26.7  | 222-869        | 782               | 24       |
|                                           | ES-62            | 703           | 676 ± 29.8  | 193-869        | 821               | 24       |
| Female                                    | PBS              | 653           | 637 ± 16.7  | 443 -760       | 727               | 24       |
|                                           | ES-62            | 629           | 610 ± 23.9  | 366 -779       | 745               | 24       |
