# Supplementary material for: The parasitic worm product ES-62 promotes health- and life-span in a high calorie diet-accelerated mouse model of ageing
Source: PubMed Central journal article supplement (PMC7108737; doi:10.1371/journal.ppat.1008391), 2020-03-12
Supplement: ppat.1008391.s002.pdf [file ppat.1008391.s002.pdf]

**S2 Table: Pathology identified post-mortem in mice from the lifespan cohort**

| Pathology                   | Male |       | Female |       |
|-----------------------------|------|-------|--------|-------|
|                             | PBS  | ES-62 | PBS    | ES-62 |
| GI tract obstruction/tumour | 1    | 1     | 2      | 1     |
| Hepatic tumour              | 11   | 10    | 10     | 10    |
| Gonadal tumour              | -    | -     | 2      | -     |
| Multi-organ tumour          | 1    | -     | -      | 1     |
| Musculoskeletal pathology   | -    | -     | 1      | 2     |
| Non-healing dermatitis      | -    | -     | 1      | -     |
| Infection                   | -    | -     | -      | 1     |
| None identified             | 11   | 14    | 10     | 9     |
| <b>Natural death</b>        | 6    | 3     | 2      | 4     |
| <b>Euthanasia</b>           | 18   | 21    | 22     | 20    |
